# Supplementary material
Source: PubMed Central journal article supplement (PMC7338046)

## SUPPLEMENTAL MATERIAL

**Supplemental Table 1**

| Number | Animal ID | Survival/Terminal | RA Line | Esophagus - Deviation | Esophagus - Lumen | Phrenic |
|--------|-----------|-------------------|---------|-----------------------|-------------------|---------|
| 1      | 595       | S                 | +       | -                     | -                 | +       |
| 2      | 597       | S                 | +       | -                     | -                 | +       |
| 3      | 598       | S                 | +       | -                     | -                 | -       |
| 4      | 25-1      | S                 | +       | +                     | -                 | +       |
| 5      | 29-1      | S                 | +       | +                     | -                 | +       |
| 6      | 29-6      | S                 | +       | +                     | -                 | +       |
| 7      | 33-1      | S                 | +       | +                     | -                 | +       |
| 8      | 590       | T                 | +       | -                     | -                 | -       |
| 9      | 591       | T                 | +       | -                     | -                 | -       |
| 10     | S47A      | T                 | +       | -                     | -                 | -       |
| 11     | S47B      | T                 | +       | -                     | -                 | -       |
| 12     | 596       | T                 | +       | -                     | -                 | -       |
| 13     | S49A      | T                 | +       | -                     | -                 | -       |
| 14     | S49B      | T                 | +       | -                     | -                 | -       |
| 15     | 620       | T                 | +       | -                     | -                 | -       |
| 16     | 621       | T                 | +       | -                     | ++                | -       |
| 17     | 624       | T                 | +       | -                     | ++                | -       |
| 18     | S56A      | T                 | +       | -                     | -                 | -       |
| 19     | S56B      | T                 | +       | -                     | -                 | -       |
| 20     | 645       | T                 | +       | -                     | ++                | -       |
| 21     | 646       | T                 | +       | -                     | ++                | -       |
| 22     | 657       | T                 | -       | -                     | -                 | ++      |
| 23     | 658       | T                 | -       | -                     | -                 | ++      |
| 24     | S60A      | T                 | -       | -                     | -                 | +       |
| 25     | S60B      | T                 | -       | -                     | -                 | +       |

Supplemental Table 1: Procedures applied to each animal. **S** indicates animal with a survival procedure and subsequent survival period prior to terminal procedure (chronic group). **T** indicates animal with a terminal procedure only (acute group). Single **+** indicates PF ablation, while **++** indicates both PF and RF ablation.

**Supplemental Figure 1: The Effect of Radiofrequency Ablation on the Esophagus in an esophageal deviation animal model**

Radiofrequency ablation was performed at the endocardial superior vena cava-right atrial junction of a swine in which the esophagus was mechanically deviated into close proximity with the high right atrium. The yellow arrow marks the resultant injury of the esophagus.

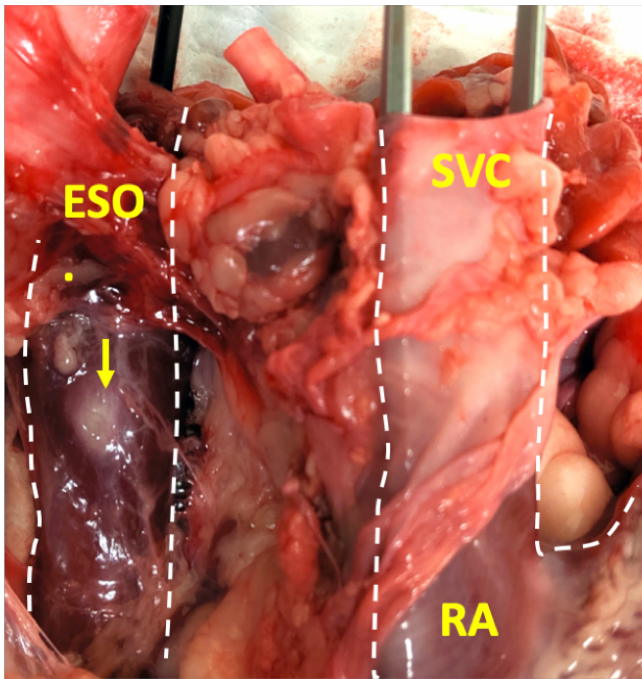

Supplement: NIHMS1596870-supplement-008580_-_Supplemental_Material.pdf [file NIHMS1596870-supplement-008580_-_Supplemental_Material.pdf]
